# Supplementary material for: Exploring different coordination modes of the first tetradentate NHC/1,2,3-triazole hybrid ligand for group 10 complexes
Source: Royal Society of Chemistry journal article supplement (doi:10.1039/c9dt03430g), 2019-01-01
Supplement: c9dt03430g1.pdf [file c9dt03430g1.pdf]

## Supporting Information

### **Exploring Different Coordination Modes of the First Tetradentate NHC/1,2,3-Triazole Hybrid Ligand for Group 10 Complexes**

Jonas F. Schlagintweit,<sup>[a]</sup> Linda Nguyen,<sup>[a,b]</sup> Florian Dyckhoff,<sup>[a]</sup> Felix Kaiser,<sup>[a]</sup> Robert M. Reich,<sup>[a]</sup> Fritz E. Kühn\*<sup>[a]</sup>

## Table of Contents

|                                                               |    |
|---------------------------------------------------------------|----|
| 1. Synthesis of 1,1'-Methylenebisimidazole .....              | 3  |
| 2. NMR spectroscopy .....                                     | 4  |
| 3. Variable Temperature <sup>1</sup> H-NMR Spectroscopy ..... | 17 |
| 4. Crystallographic data .....                                | 19 |
| 5. References .....                                           | 19 |

## 1. Synthesis of 1,1'-Methylenebisimidazole

Imidazole (50 g, 734 mmol, 1.00 eq.) and tetrabutylammonium bromide (7.10 g, 22.0 mmol, 0.03 eq.) are dissolved in 500 mL concentrated NaOH. Subsequently, CH<sub>2</sub>Cl<sub>2</sub> (500 mL, 9.53 mol, 10.6 eq.) is added. The mixture is refluxed overnight. CH<sub>2</sub>Cl<sub>2</sub> is removed under reduced pressure. The suspension is filtered to obtain a pale yellow residue. After washing with cold CH<sub>2</sub>Cl<sub>2</sub> (-40 °C, 4x50 mL) and drying of the solid at 60 °C it is extracted with 500 mL CH<sub>2</sub>Cl<sub>2</sub> using Soxhlet extractor overnight. The resulting suspension is concentrated to 150 mL, cooled to -40 °C and filtered. The filtrate is concentrated to 50 mL, cooled to -40 °C and filtered again. After drying of the combined residues 1,1'-methylenebisimidazole (47.3 g, 319 mmol, 87%) is obtained as a white crystalline solid.

<sup>1</sup>H-NMR (400 MHz, DMSO-*d*<sub>6</sub>, 296 K): δ 7.92 (t, <sup>3</sup>J = 1.2 Hz, 2H, NCHN), 7.39 (d, <sup>3</sup>J = 1.2 Hz, 2H, NCHC), 6.90 (t, <sup>3</sup>J = 1.2 Hz, 2H, NCHC), 6.21 (s, 2H, CH<sub>2</sub>).

<sup>13</sup>C-NMR (101 MHz, DMSO-*d*<sub>6</sub>, 296 K): δ 137.31 (NCHN), 129.16 (NCHC), 119.16 (NCHC), 54.82 (CH<sub>2</sub>).

Anal. calcd. for C<sub>7</sub>H<sub>8</sub>N<sub>4</sub>: C 56.74; H 5.44; N 37.81. Found: C 56.79; H 5.61; N 37.55.

## 2. NMR spectroscopy

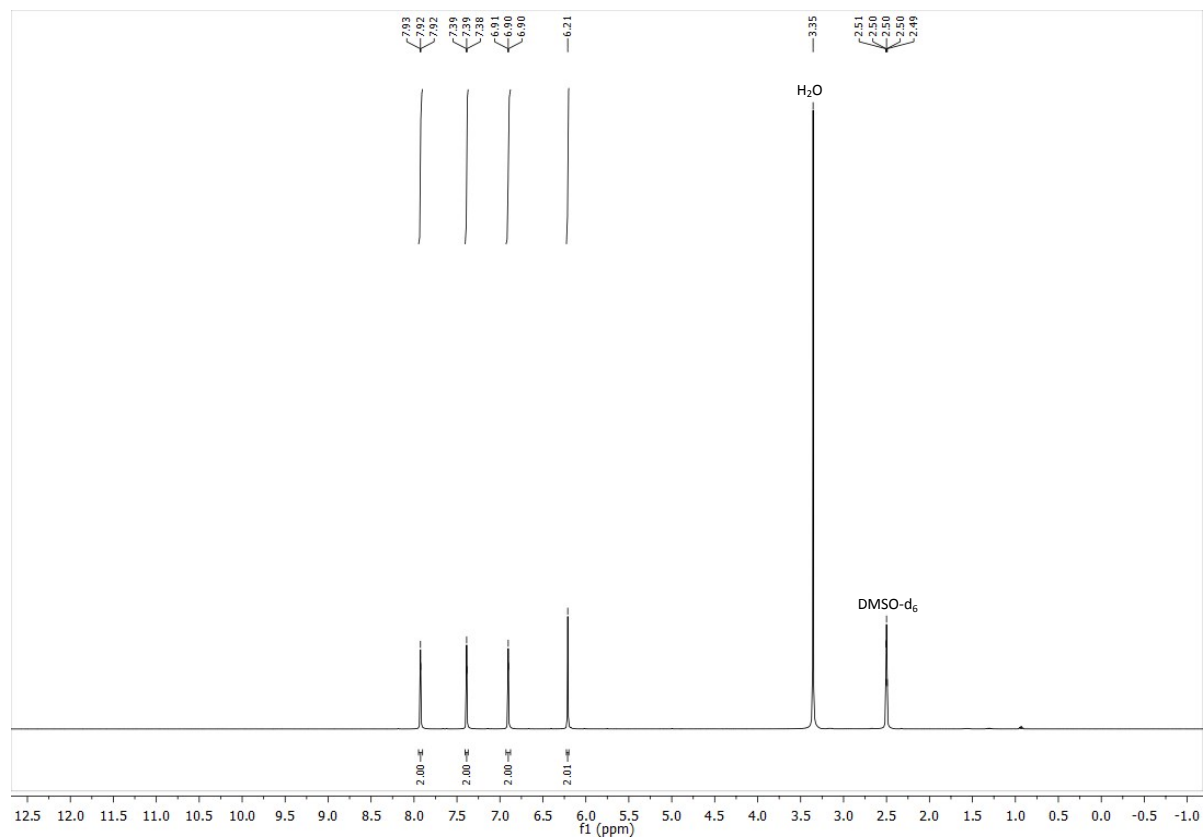

Figure 1. <sup>1</sup>H-NMR of 1,1'-Methylenebisimidazole in DMSO-d<sub>6</sub>.

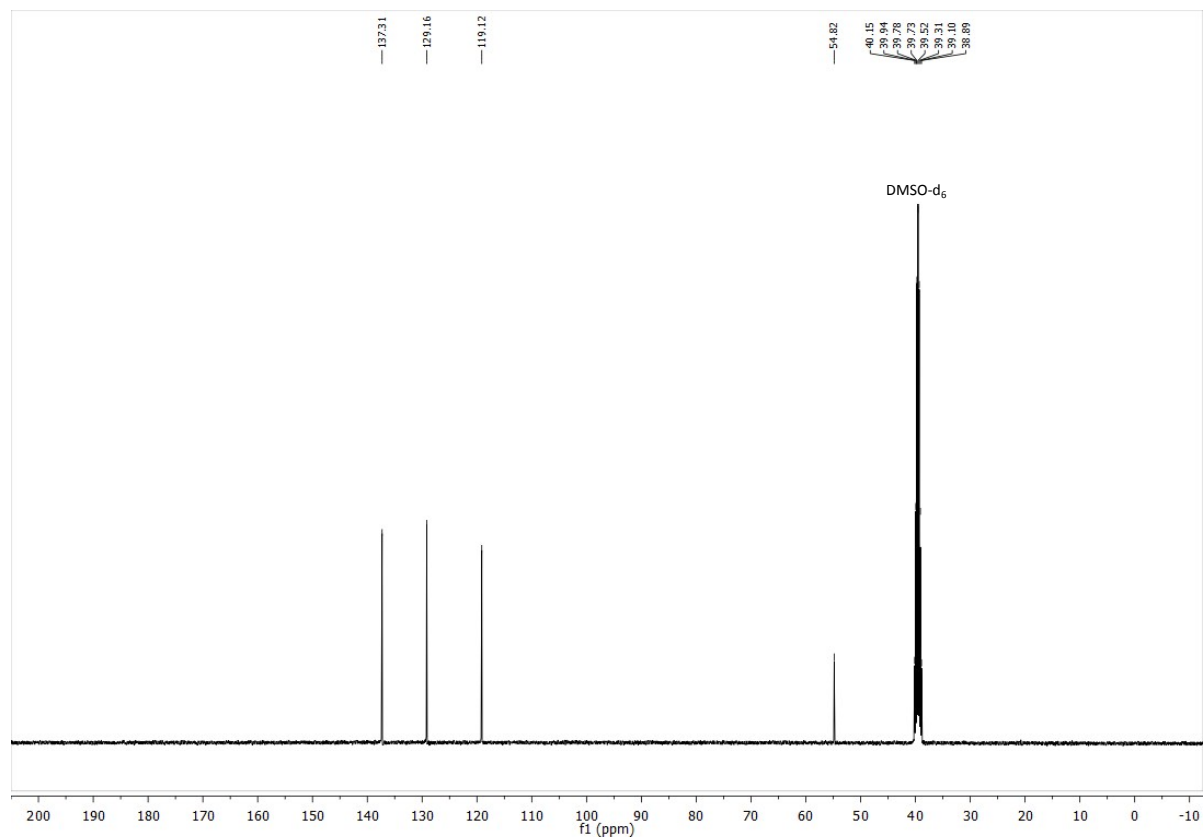

Figure 2. <sup>13</sup>C-NMR of 1,1'-Methylenebisimidazole in DMSO-d<sub>6</sub>.

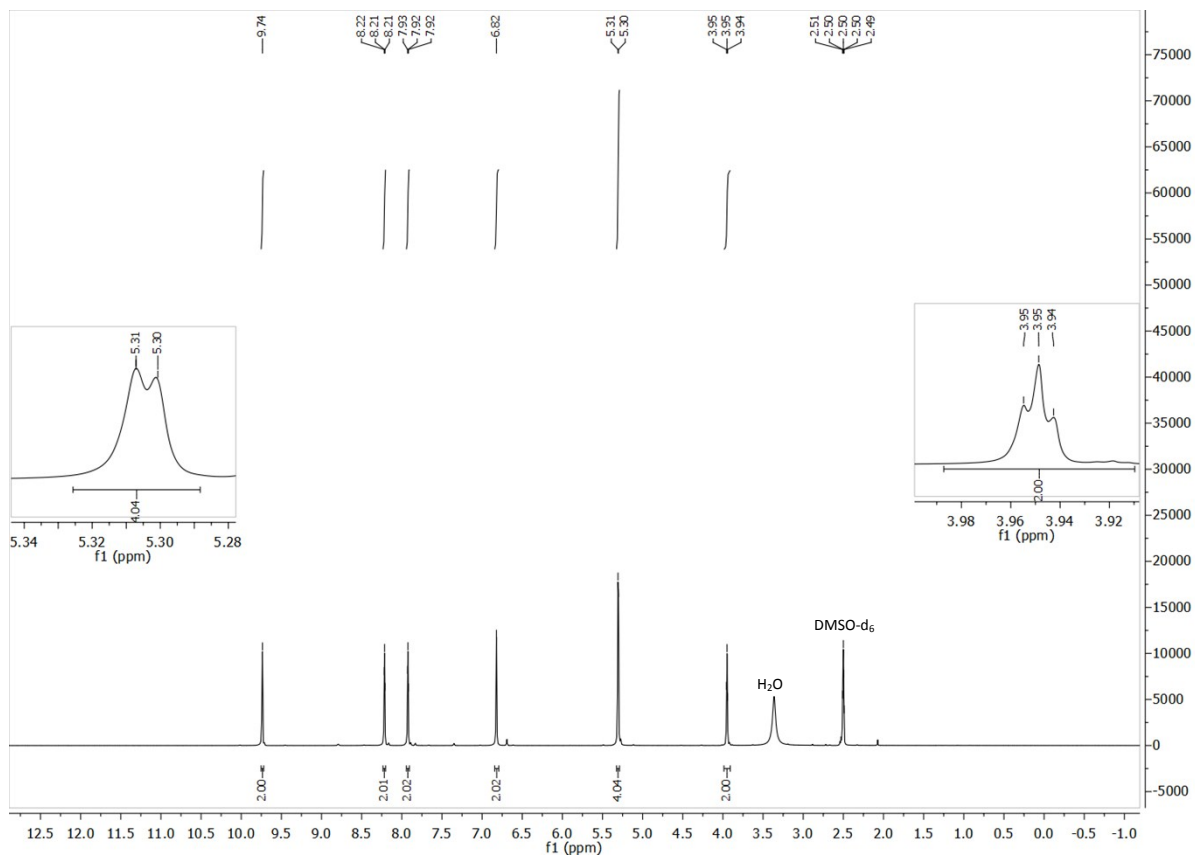

Figure 3.  $^1\text{H-NMR}$  of **1** in  $\text{DMSO-d}_6$ .

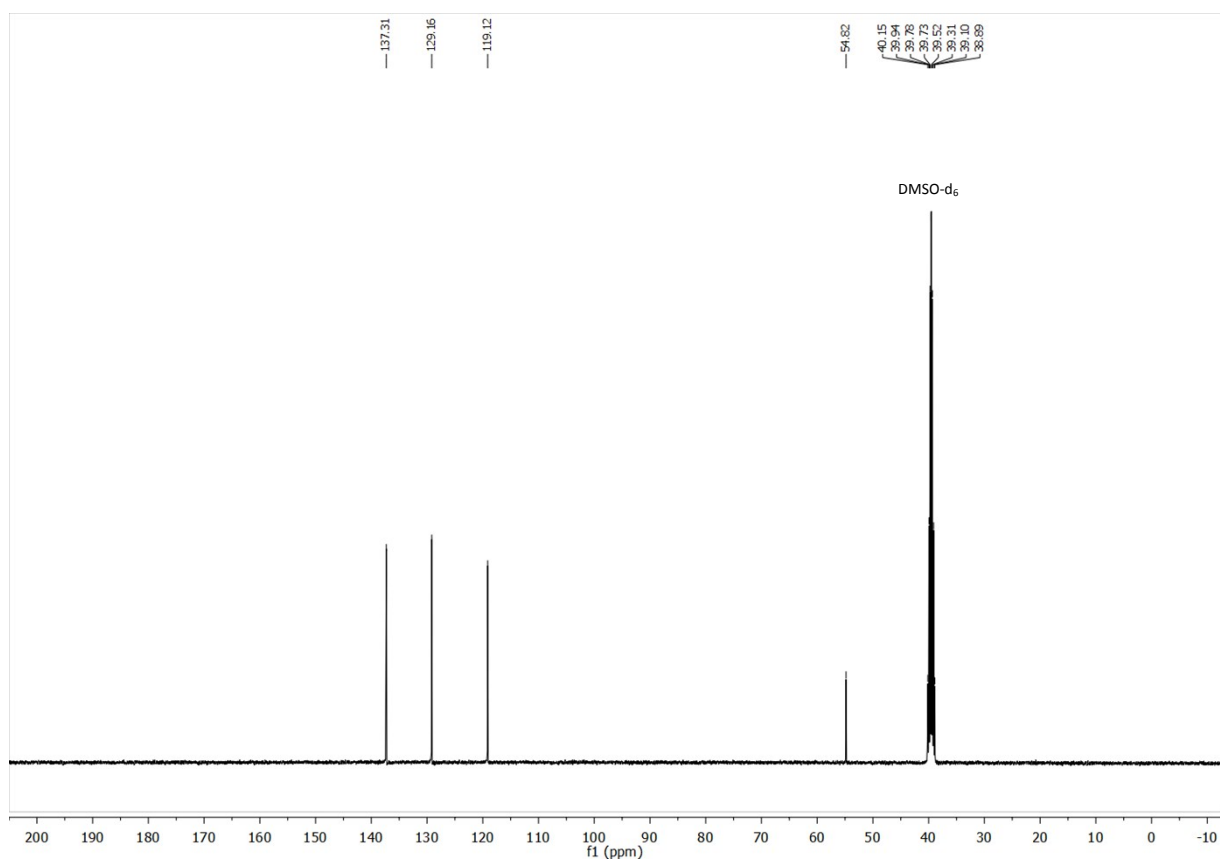

Figure 4.  $^{13}\text{C-NMR}$  of **1** in  $\text{DMSO-d}_6$ .

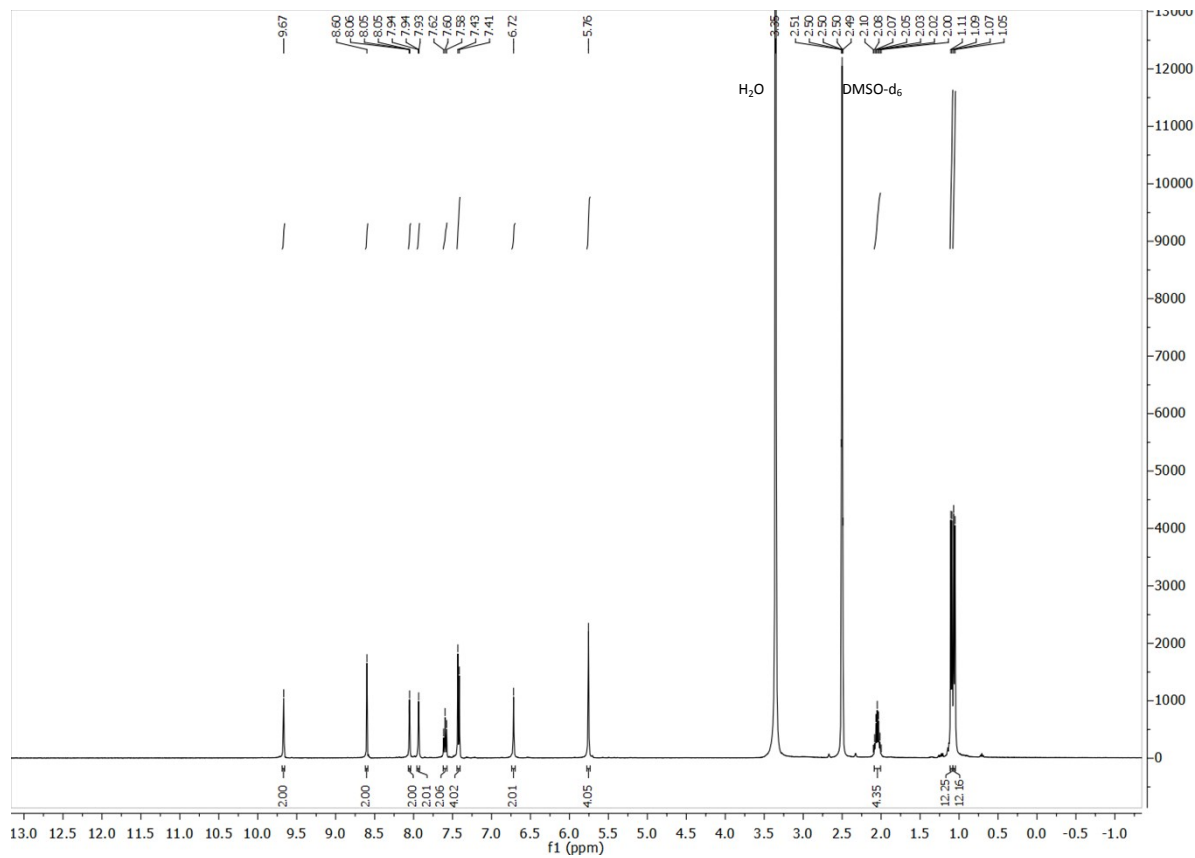

Figure 5.  $^1\text{H-NMR}$  of **2** in  $\text{DMSO-}d_6$ .

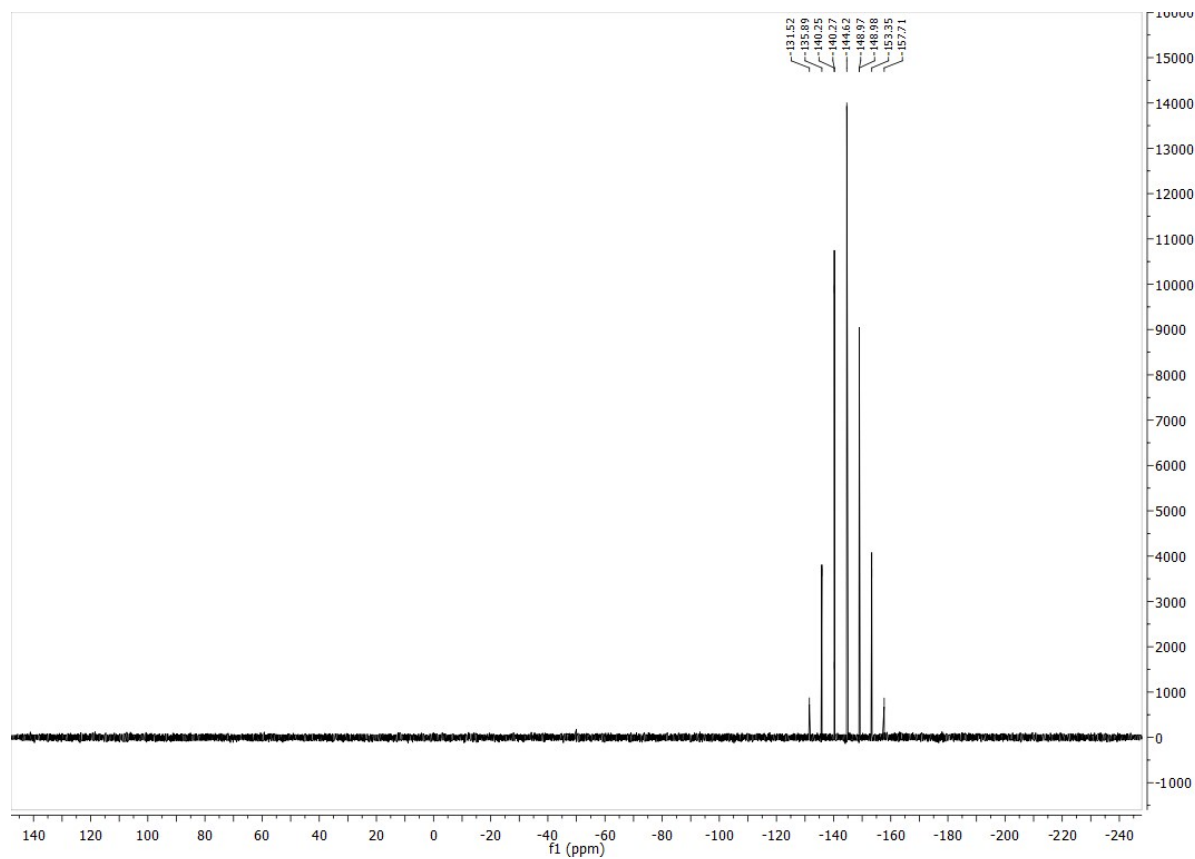

Figure 6.  $^{13}\text{P-NMR}$  of **2** in  $\text{DMSO-}d_6$ .

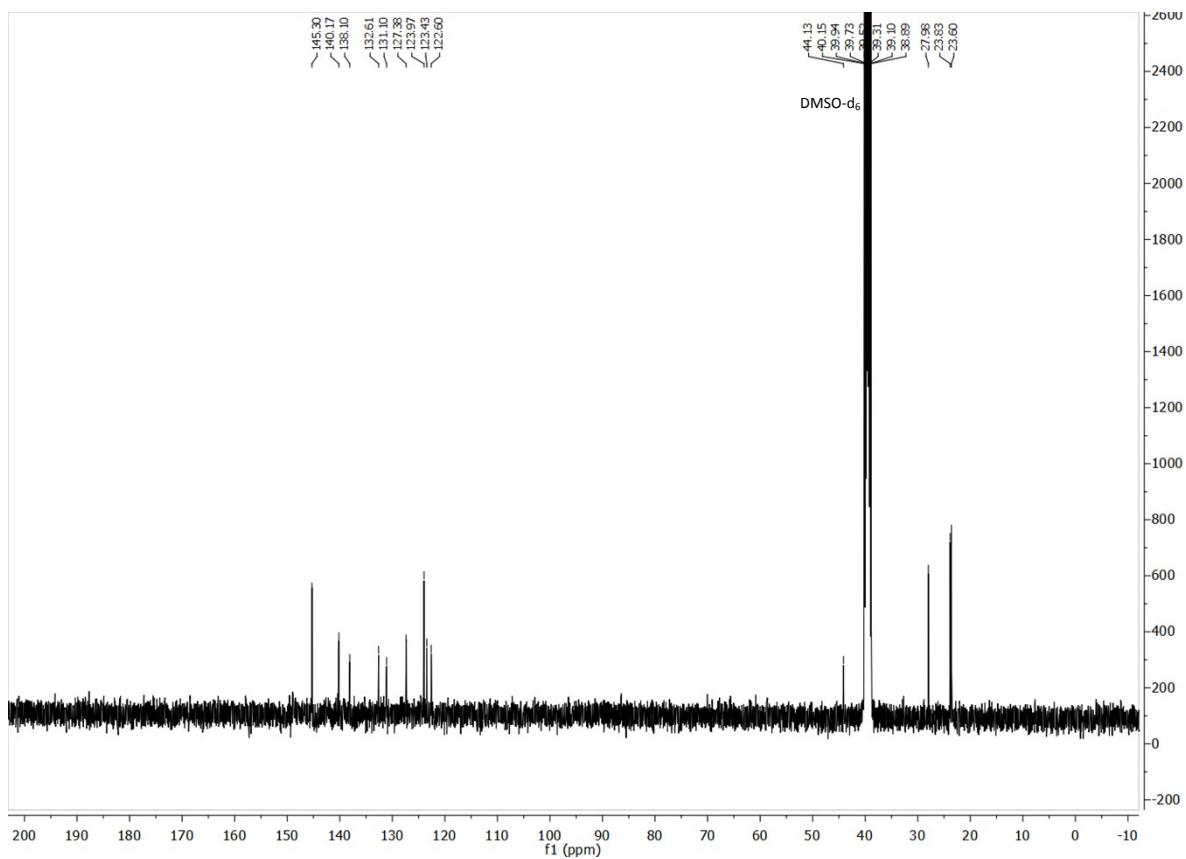

Figure 7. <sup>13</sup>C-NMR of 2 in DMSO-d<sub>6</sub>.

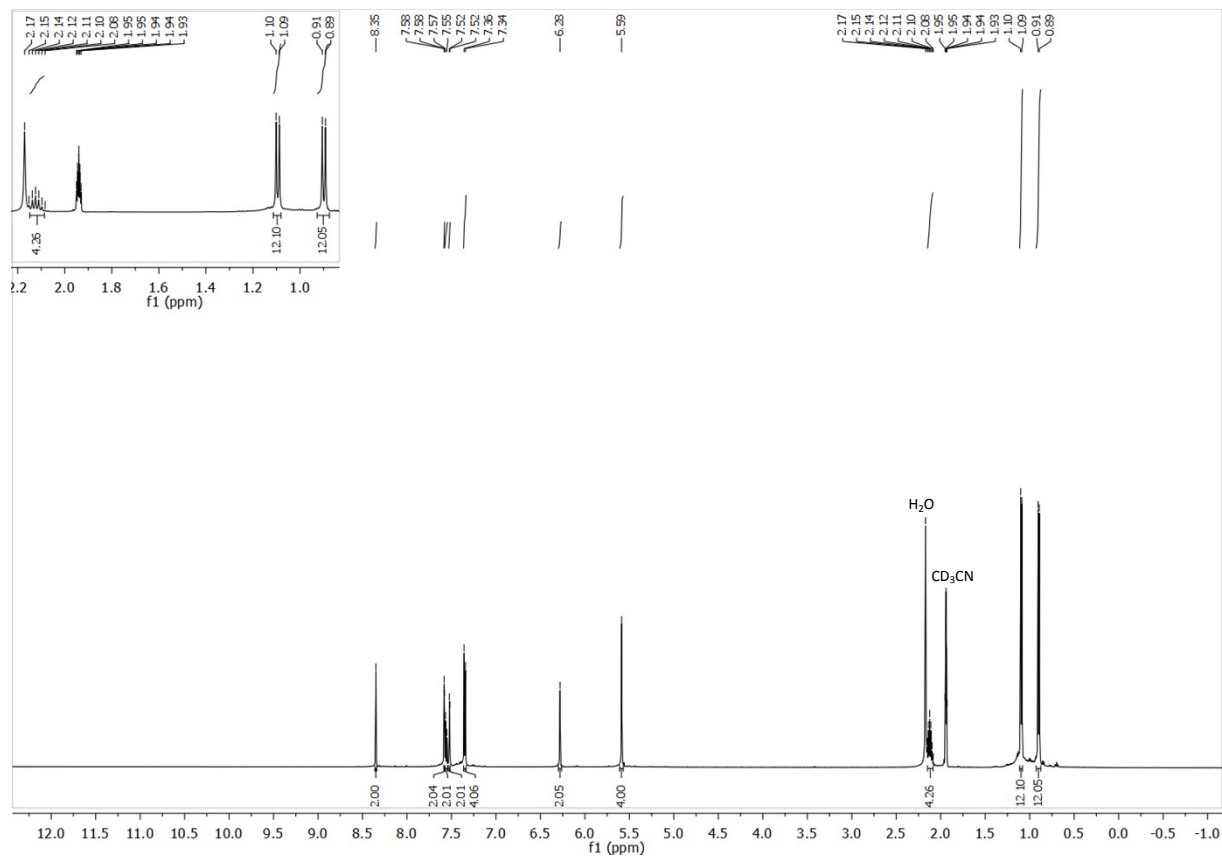

Figure 8. <sup>1</sup>H-NMR of 3 in CD<sub>3</sub>CN.

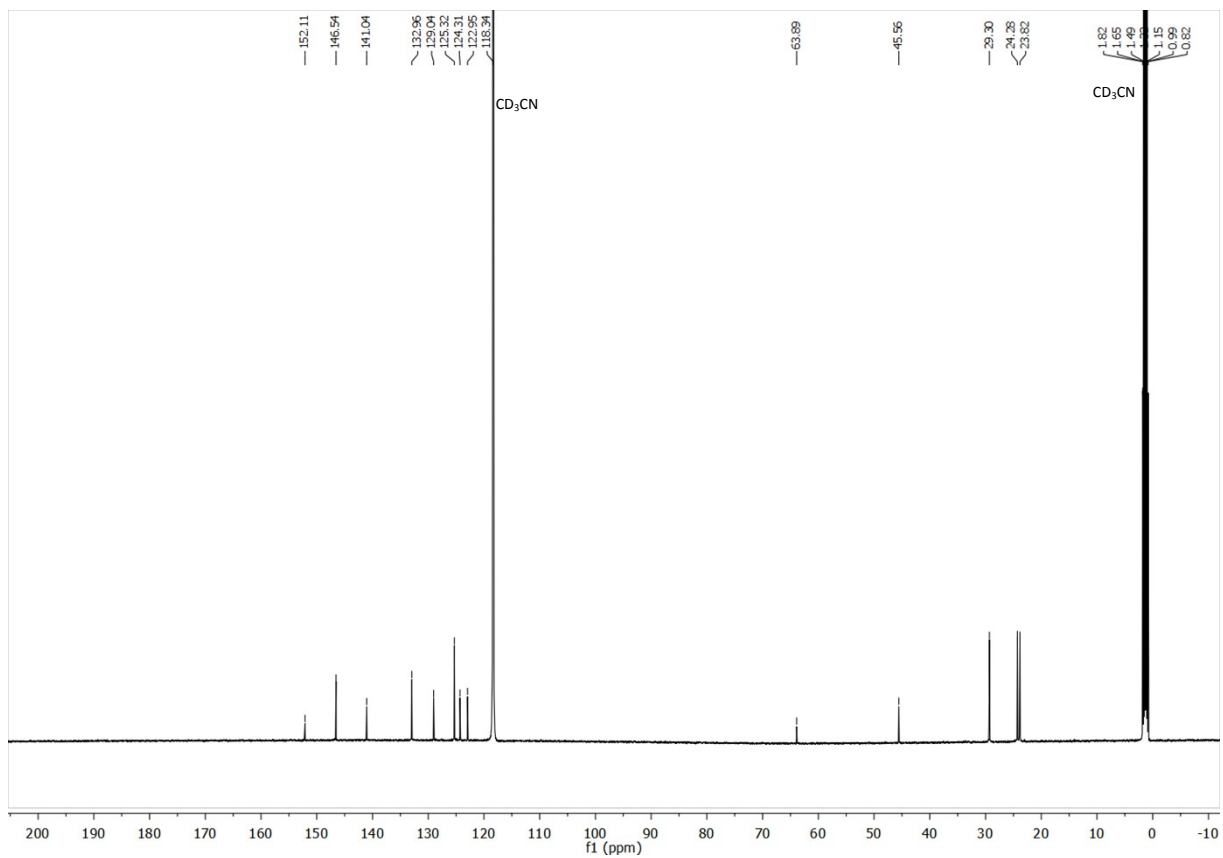

Figure 9.  $^{13}\text{C-NMR}$  of **3** in  $\text{CD}_3\text{CN}$ .

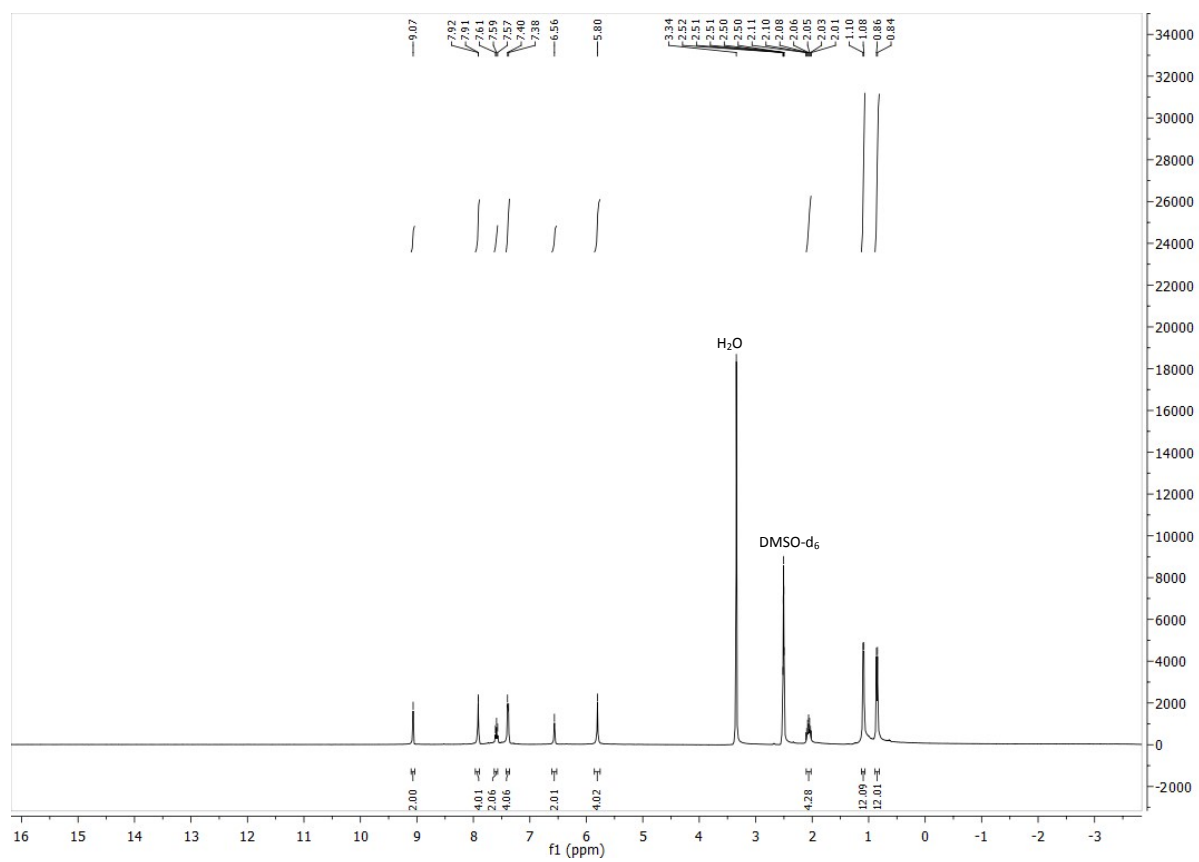

Figure 10.  $^1\text{H-NMR}$  of **3** in  $\text{DMSO-d}_6$ .



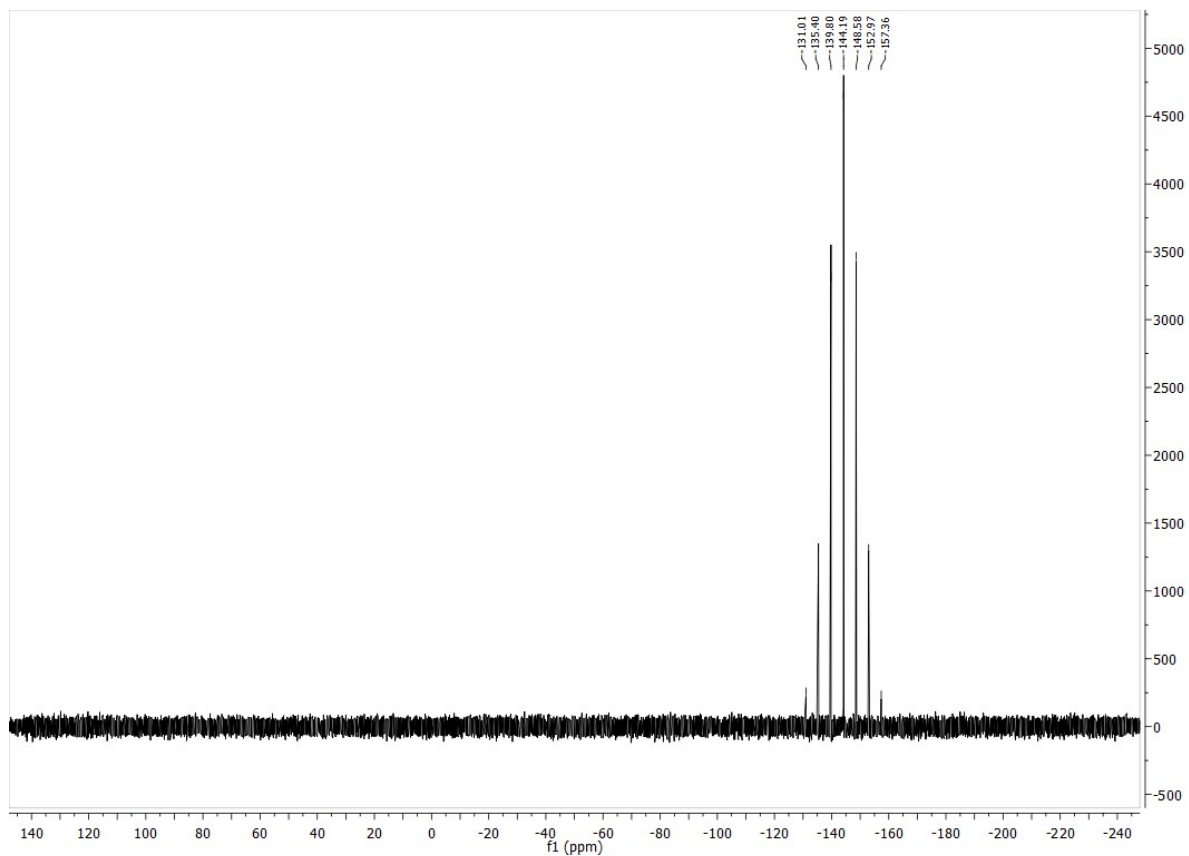

Figure 11.  $^{31}\text{P}$ -NMR of **3** in  $\text{DMSO-}d_6$ .

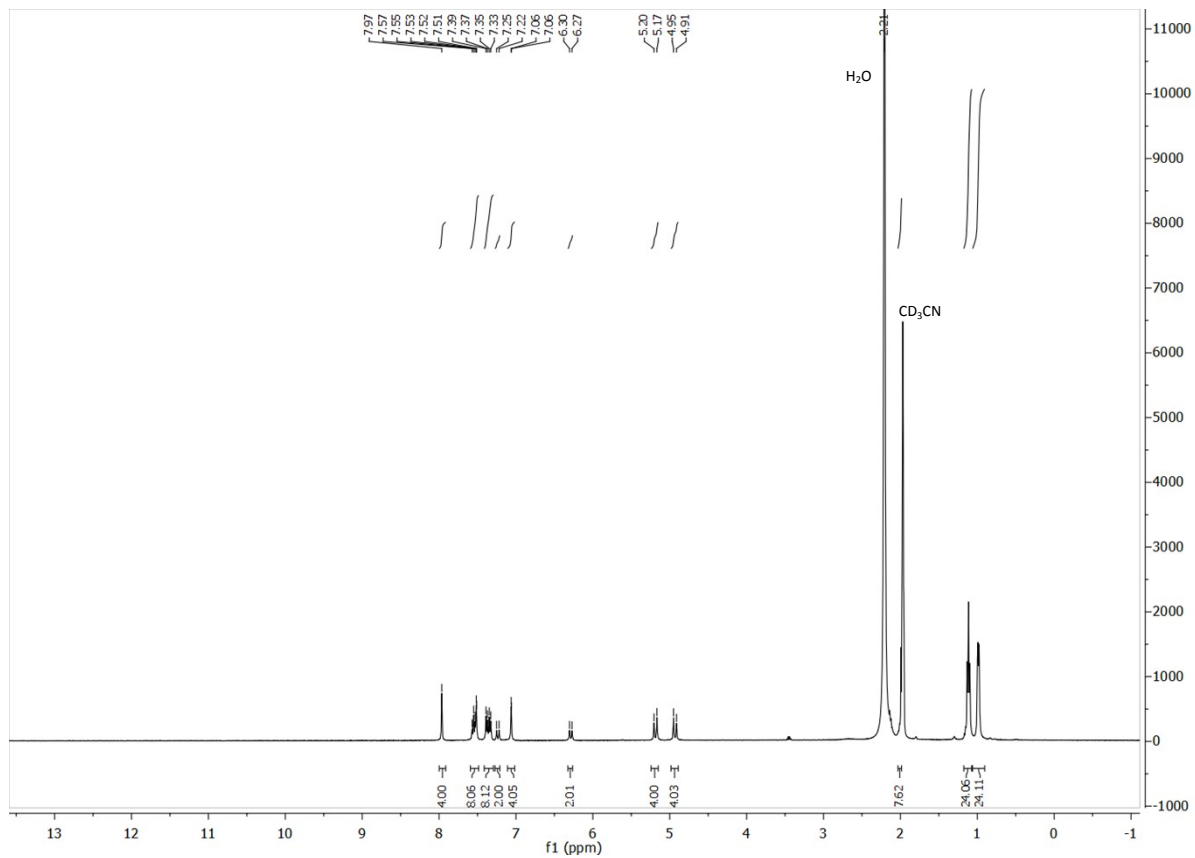

Figure 12.  $^1\text{H}$ -NMR of **4** in  $\text{CD}_3\text{CN}$ .

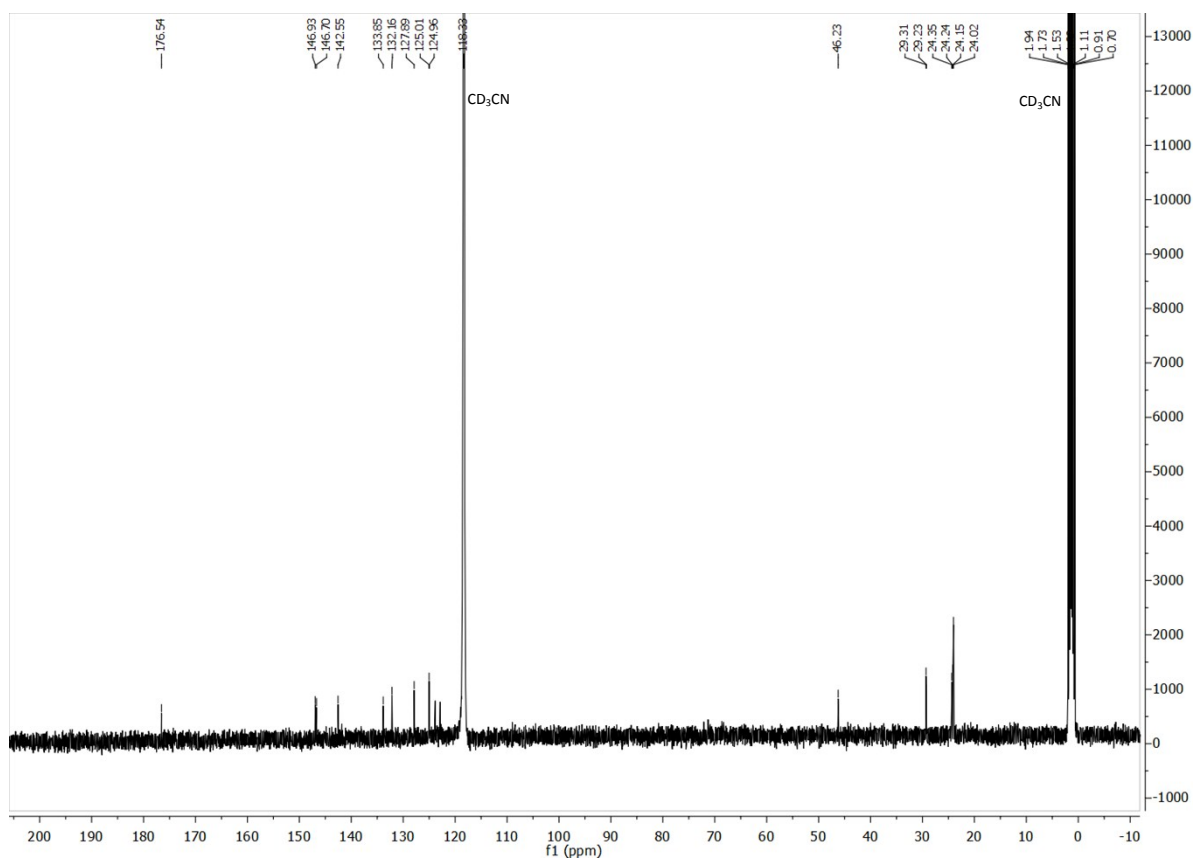

Figure 13. <sup>13</sup>C-NMR of 4 in CD<sub>3</sub>CN.

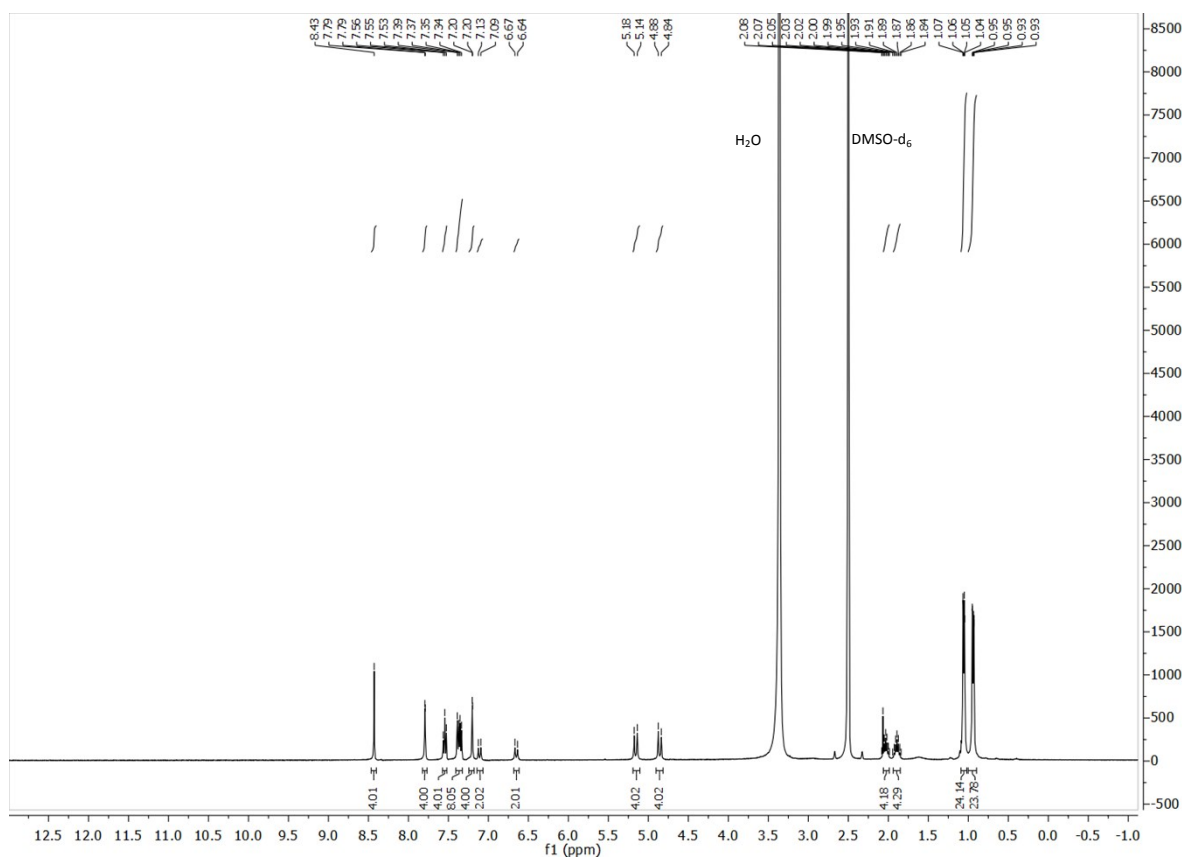

Figure 14. <sup>1</sup>H-NMR of 4 in DMSO-*d*<sub>6</sub>.

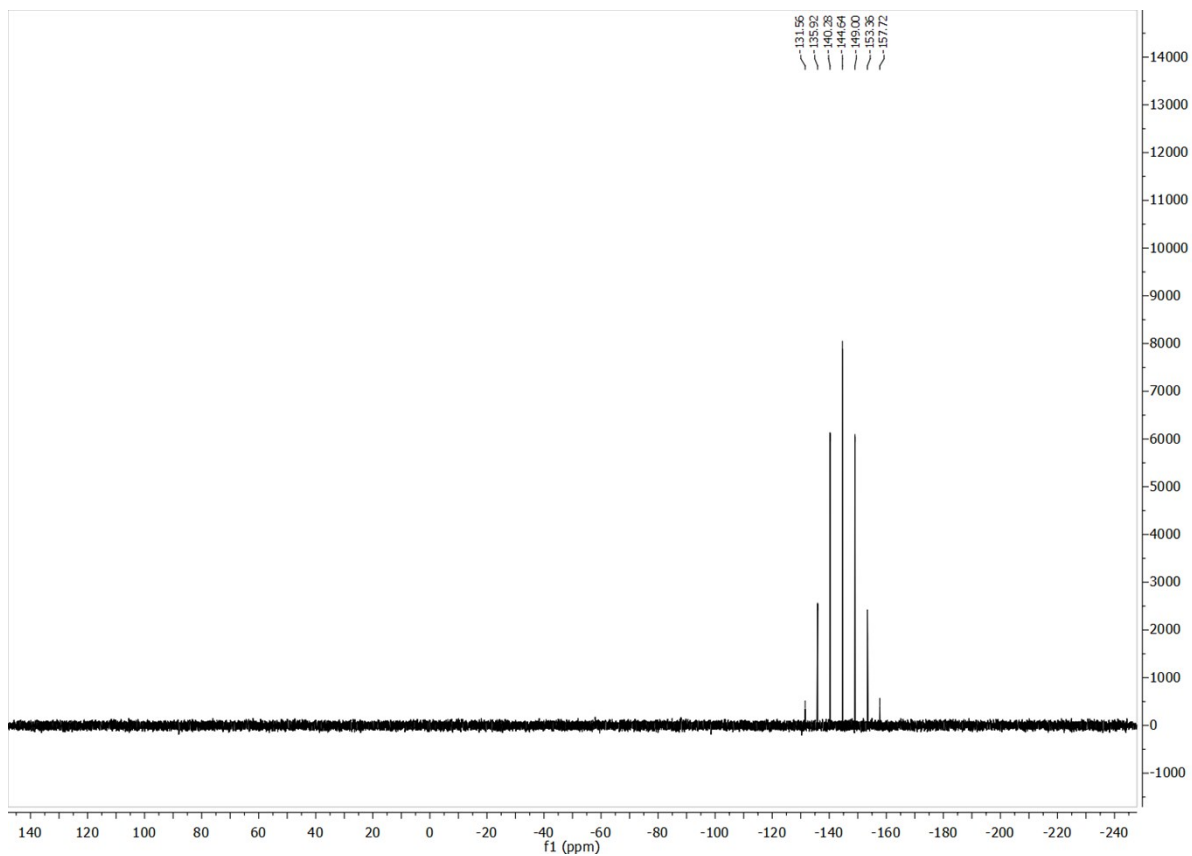

Figure 15. <sup>31</sup>P-NMR of 4 in DMSO-d<sub>6</sub>.

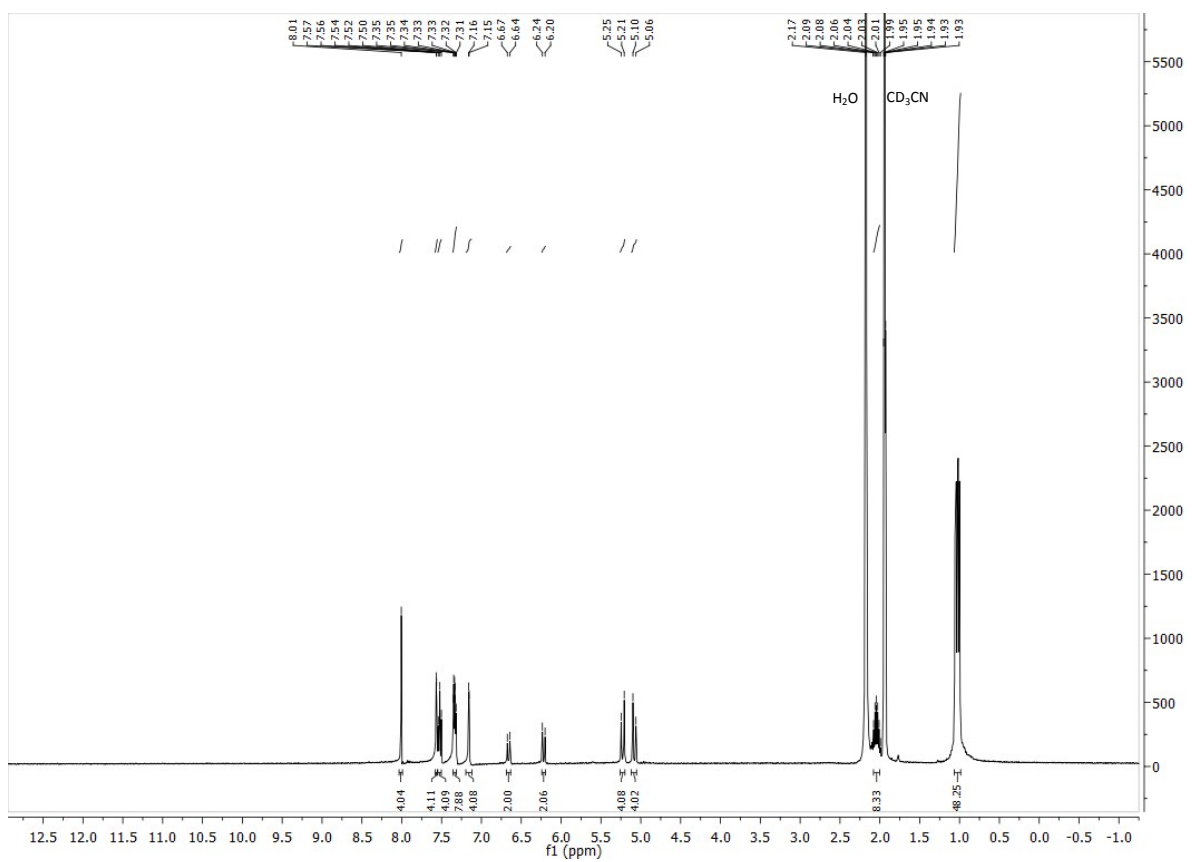

Figure 16. <sup>1</sup>H-NMR of 5 in CD<sub>3</sub>CN.

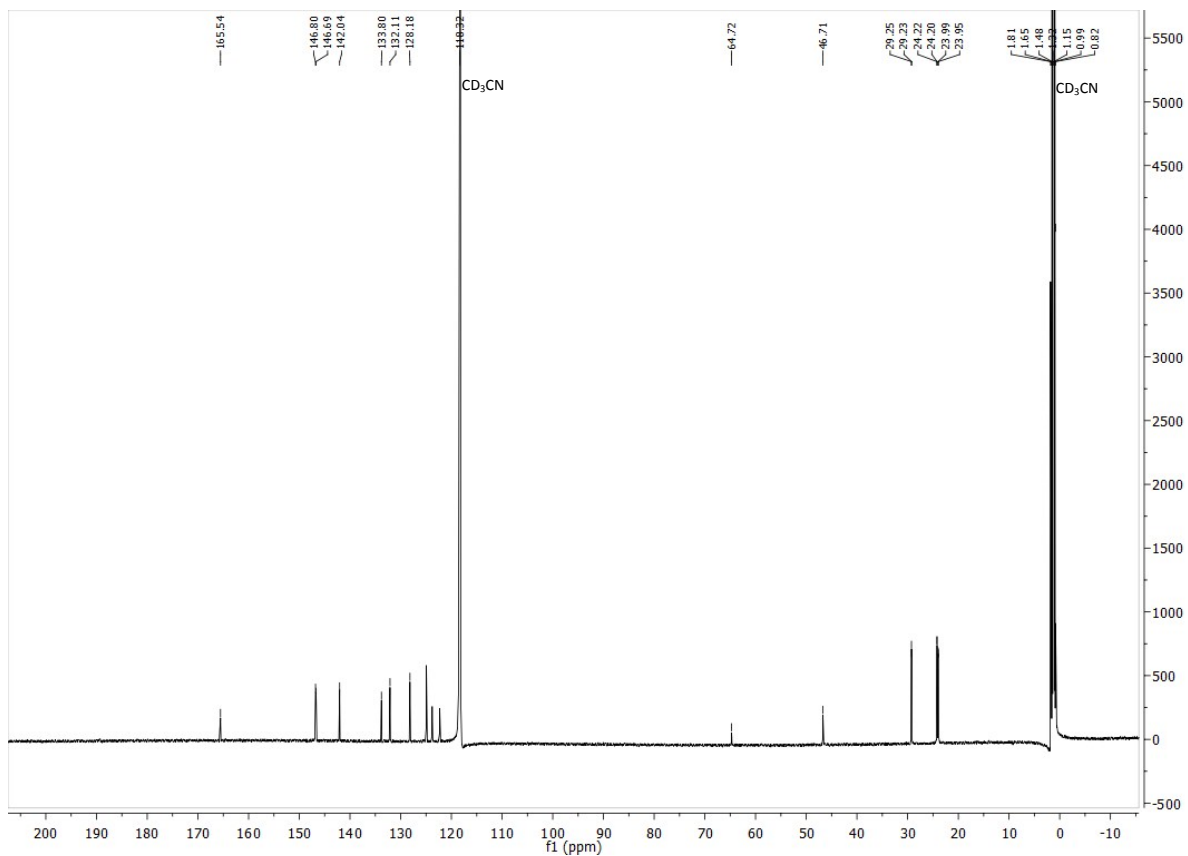

**Figure 17.**  $^{13}\text{C}$ -NMR of **5** in  $\text{CD}_3\text{CN}$ .

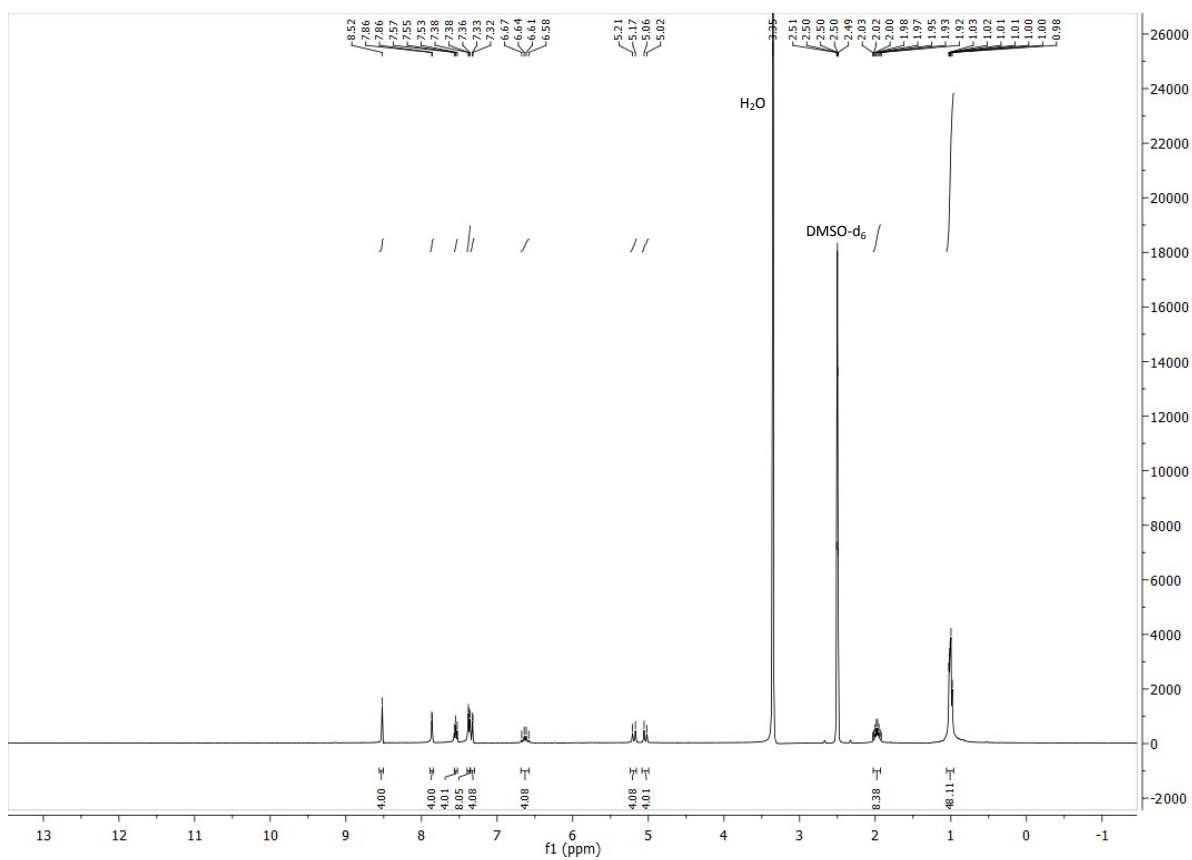

**Figure 18.**  $^1\text{H}$ -NMR of **5** in  $\text{DMSO}-d_6$ .

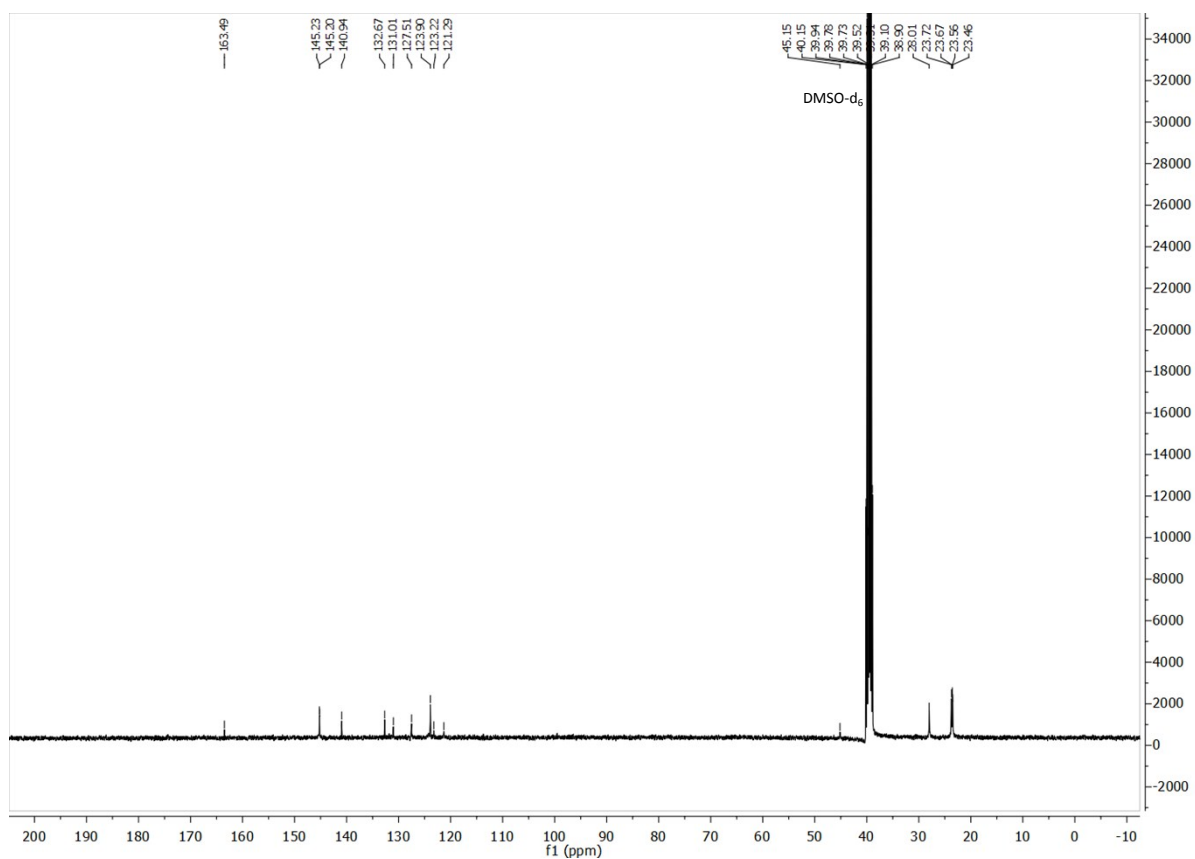

**Figure 19.**  $^{13}\text{C}$ -NMR of **5** in  $\text{DMSO-}d_6$ .

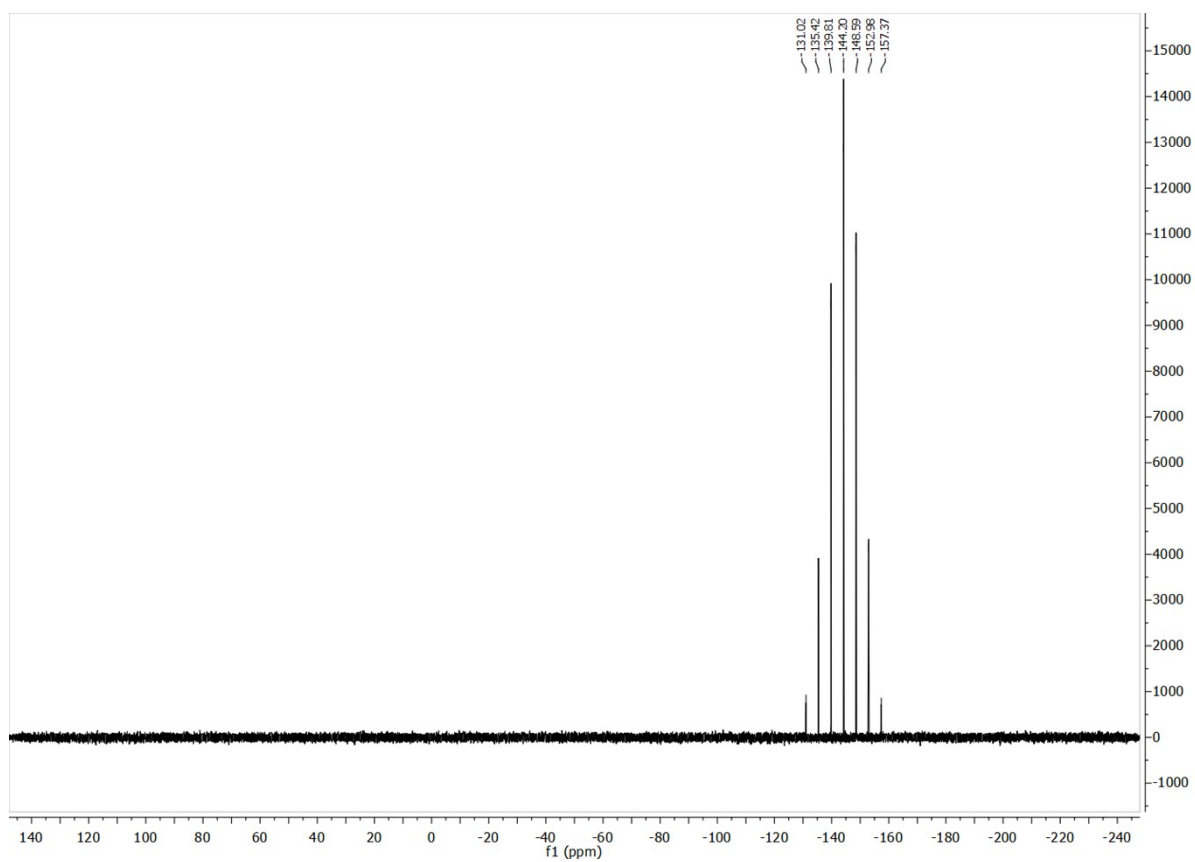

**Figure 20.**  $^{31}\text{P}$ -NMR of **5** in  $\text{DMSO-}d_6$ .

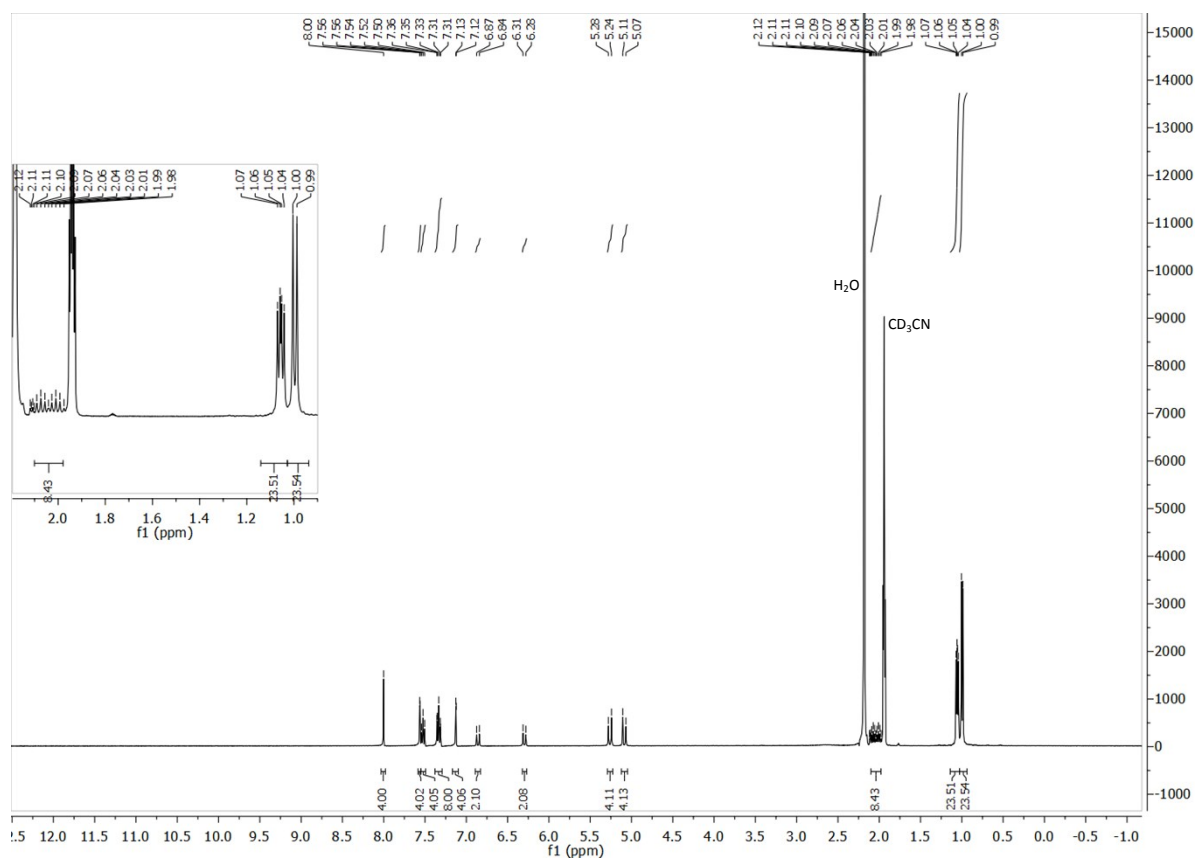

Figure 21.  $^1\text{H-NMR}$  of **6** in  $\text{CD}_3\text{CN}$ .

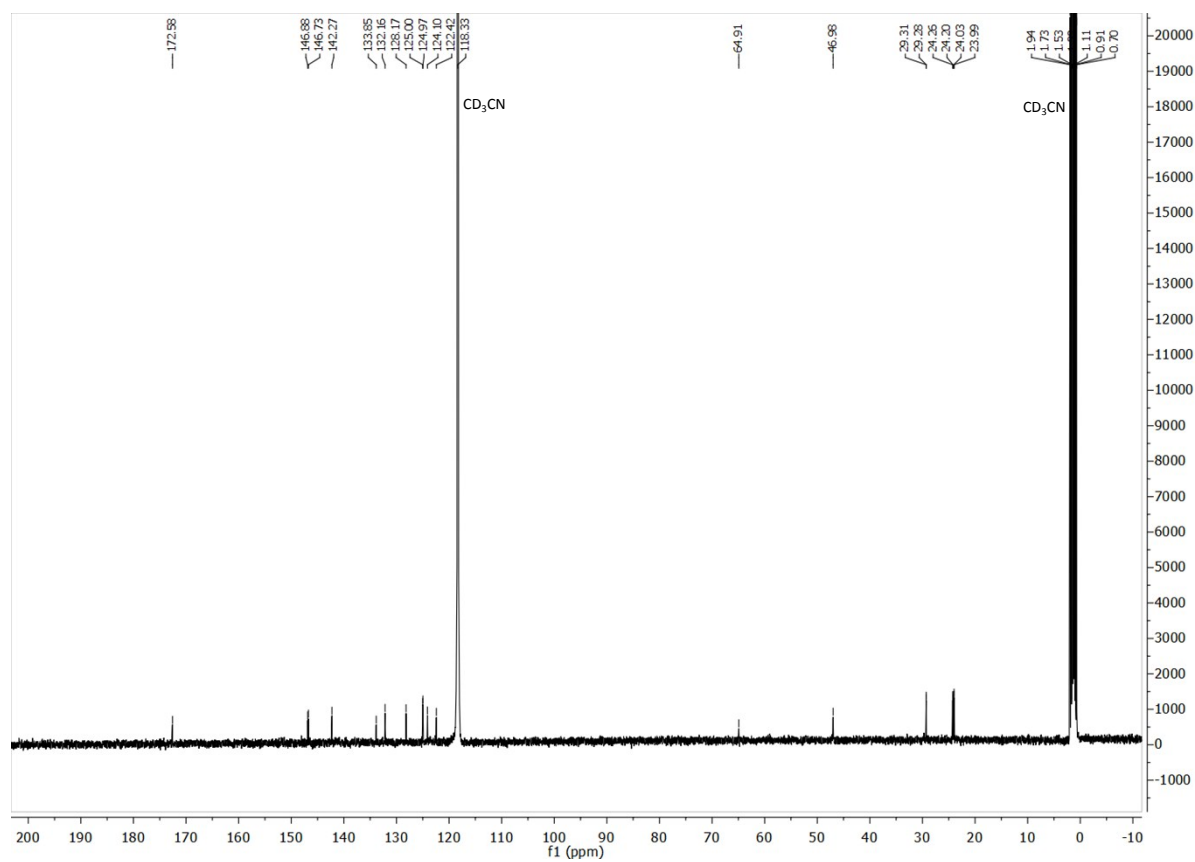

Figure 22.  $^{13}\text{C-NMR}$  of **6** in  $\text{CD}_3\text{CN}$ .

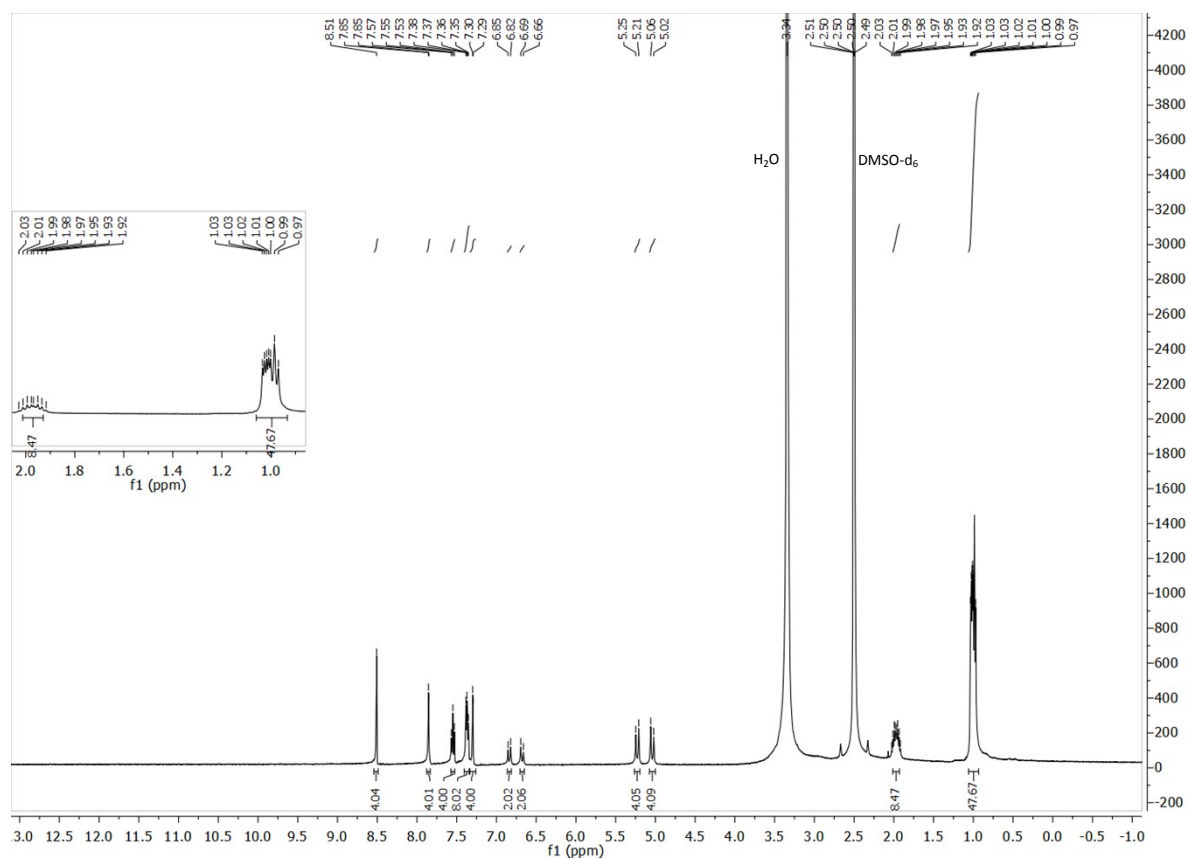

Figure 23.  $^1\text{H-NMR}$  of **6** in  $\text{DMSO-}d_6$ .

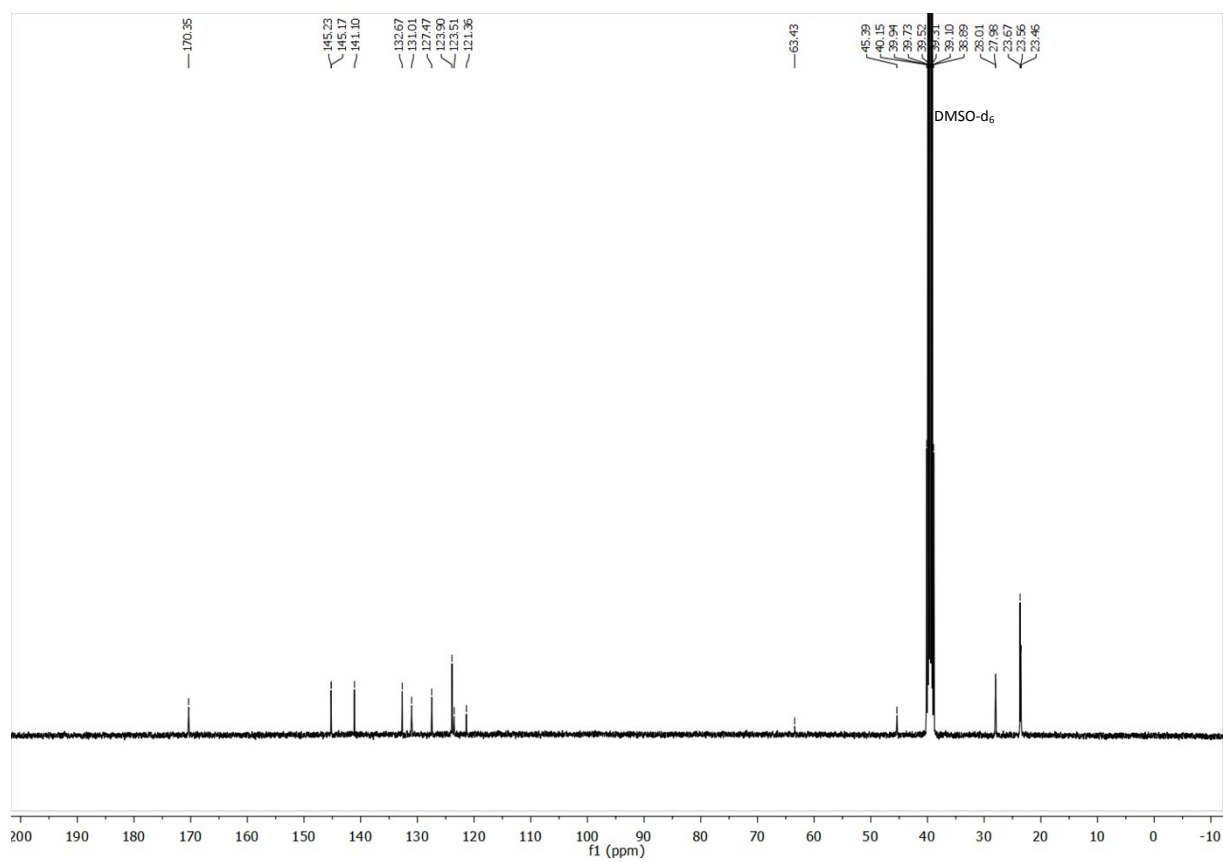

Figure 24.  $^{13}\text{C-NMR}$  of **6** in  $\text{DMSO-}d_6$ .

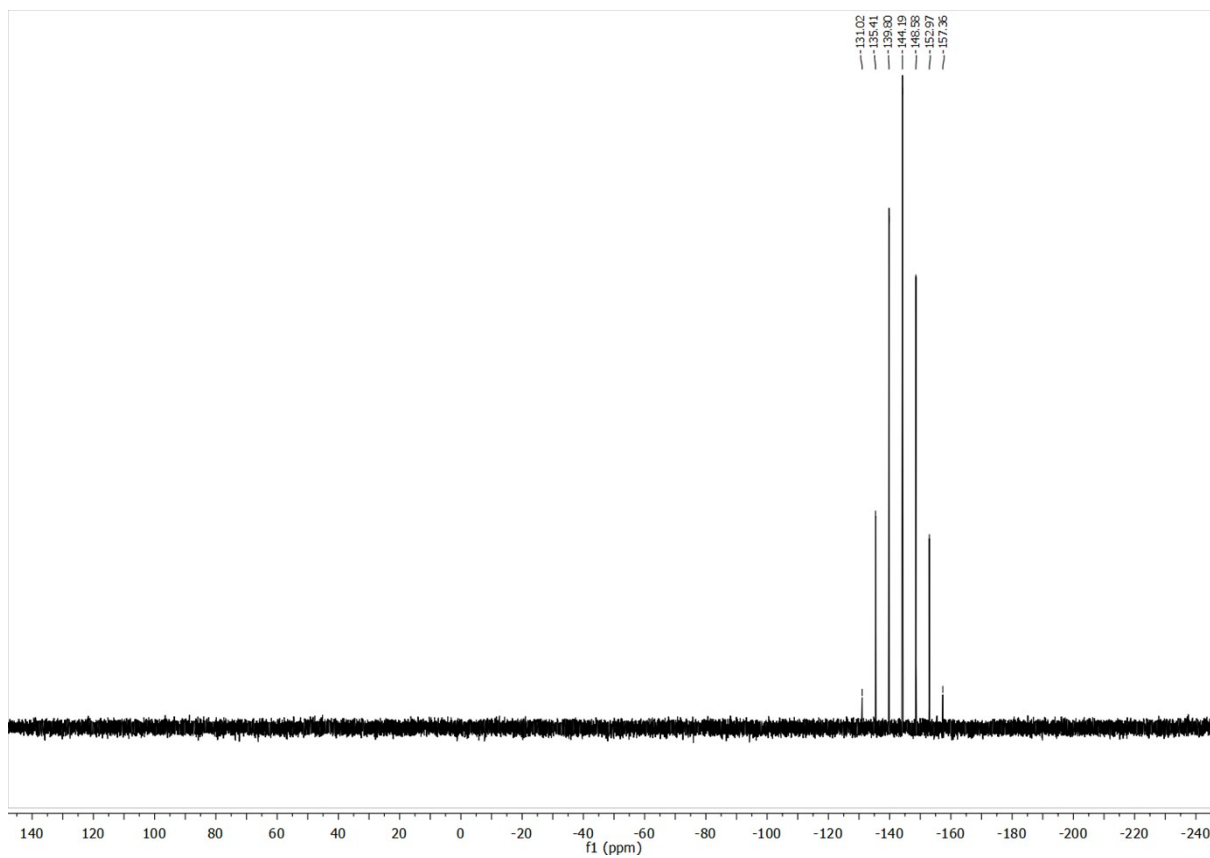

Figure 25.  $^{31}\text{P}$ -NMR of 6 in  $\text{DMSO-}d_6$ .



### 3. Variable Temperature $^1\text{H-NMR}$ Spectroscopy

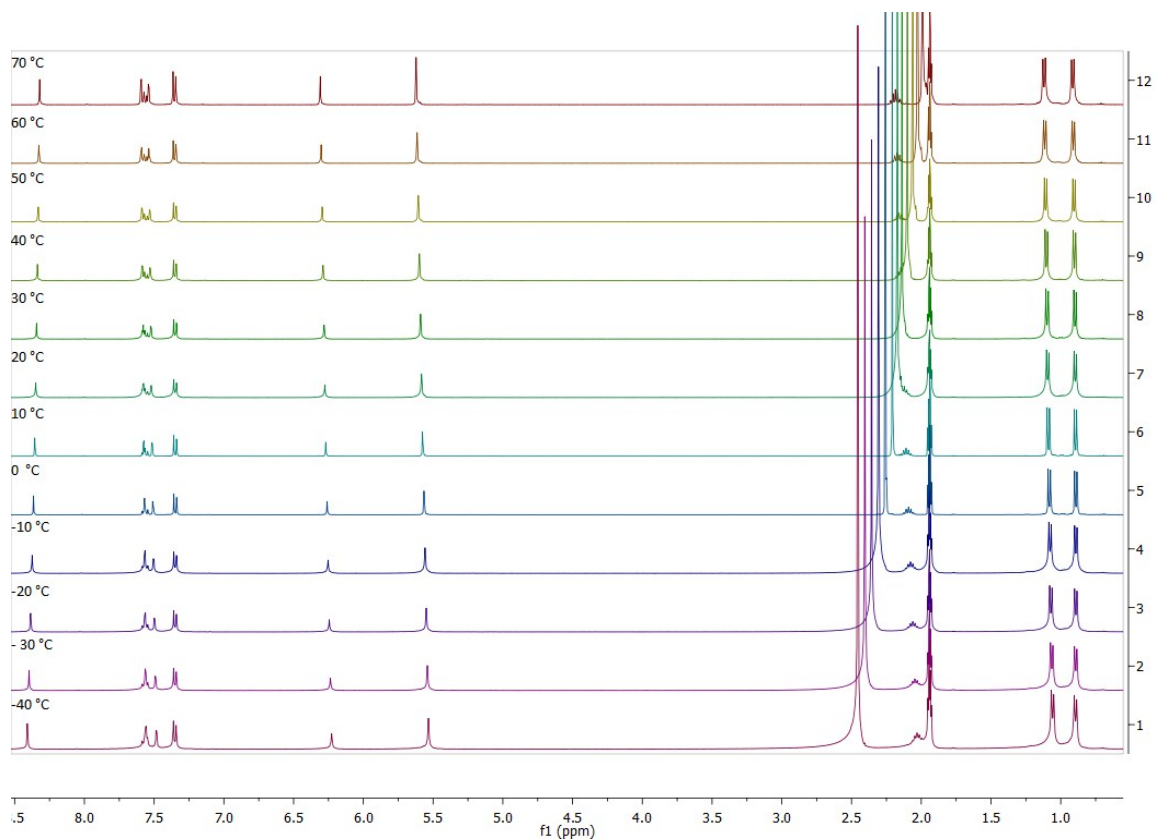

**Figure 26.**  $^1\text{H-NMR}$  of **3** in  $\text{CD}_3\text{CN}$  at various temperatures.

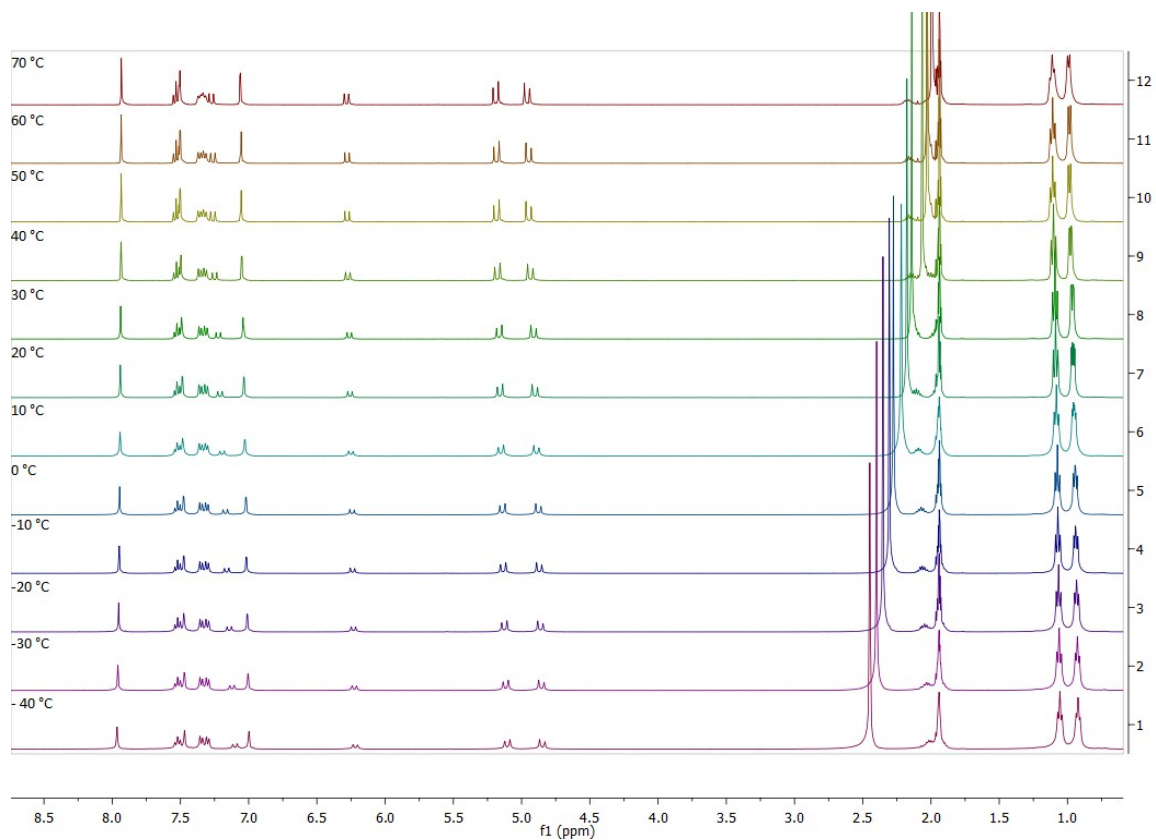

**Figure 27.**  $^1\text{H-NMR}$  of **4** in  $\text{CD}_3\text{CN}$  at various temperatures.

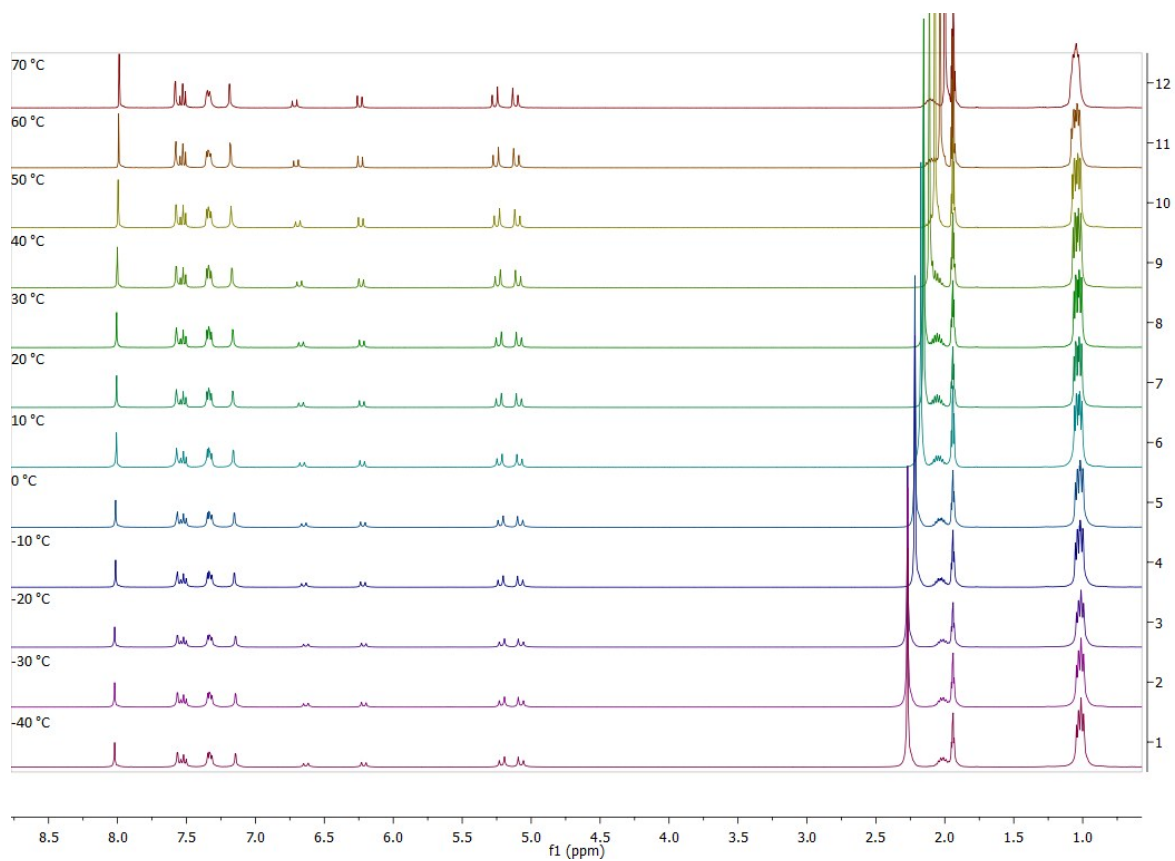

**Figure 28.**  $^1\text{H-NMR}$  of **5** in  $\text{CD}_3\text{CN}$  at various temperatures.

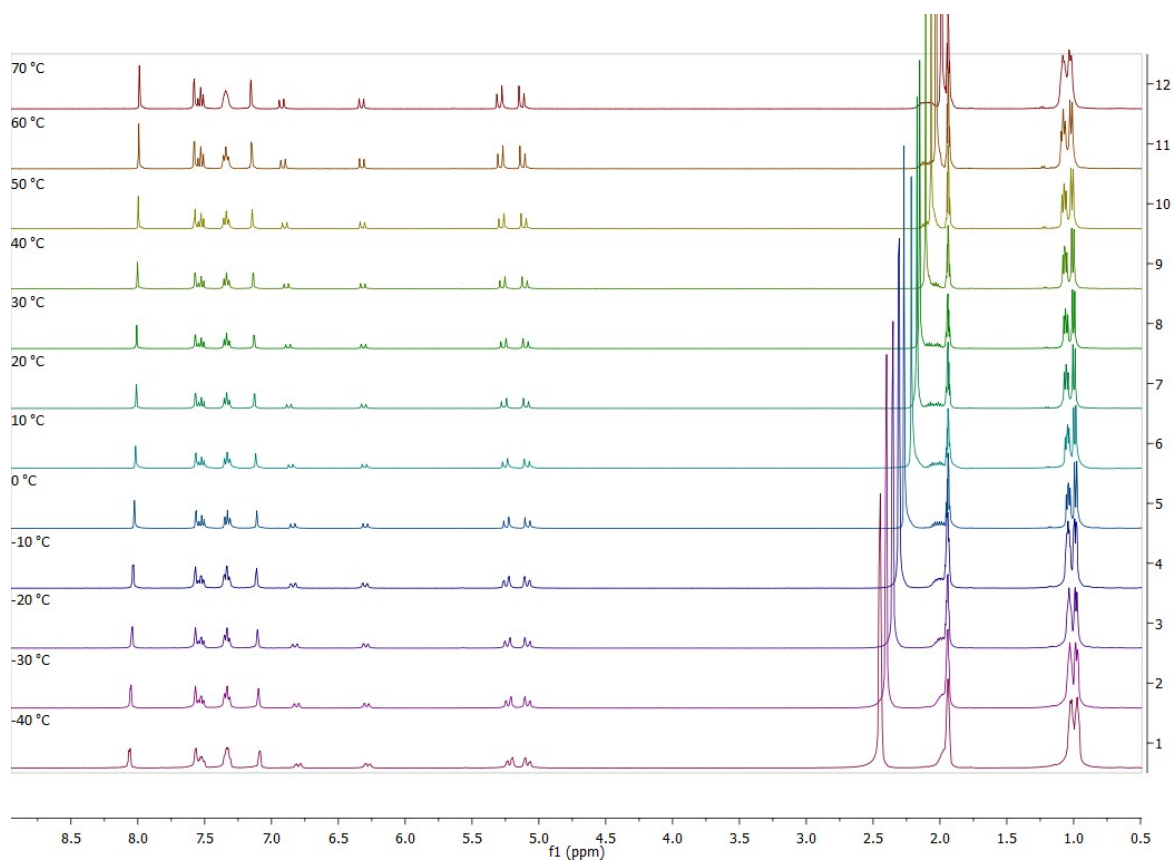

**Figure 29.**  $^1\text{H-NMR}$  of **6** in  $\text{CD}_3\text{CN}$  at various temperatures.

#### 4. Crystallographic data

**Table 1.** Crystallographic data and structure refinement parameters.

| Substance identification                             | Compound 3                                                                        | Compound 4                                                                       | Compound 6                                                                                        |
|------------------------------------------------------|-----------------------------------------------------------------------------------|----------------------------------------------------------------------------------|---------------------------------------------------------------------------------------------------|
| CCDC                                                 | 1923376                                                                           | 1923375                                                                          | 1923374                                                                                           |
| <b>Chemical formula</b>                              | C <sub>37</sub> H <sub>46</sub> F <sub>12</sub> N <sub>10</sub> P <sub>2</sub> Pd | C <sub>74</sub> H <sub>92</sub> F <sub>12</sub> N <sub>20</sub> NiP <sub>2</sub> | C <sub>82</sub> H <sub>112</sub> F <sub>12</sub> N <sub>20</sub> O <sub>2</sub> P <sub>2</sub> Pd |
| <b>Fw [g mol<sup>-1</sup>]</b>                       | 1027.18                                                                           | 1610.31                                                                          | 1806.25                                                                                           |
| <b>T [K]</b>                                         | 100(2)                                                                            | 100(2)                                                                           | 100(2)                                                                                            |
| <b>Crystal system</b>                                | triclinic                                                                         | triclinic                                                                        | triclinic                                                                                         |
| <b>Space group</b>                                   | <i>P</i> -1                                                                       | <i>P</i> -1                                                                      | <i>P</i> -1                                                                                       |
| <b>a [Å]</b>                                         | 15.1615(18)                                                                       | 9.9082(15)                                                                       | 10.2595(19)                                                                                       |
| <b>b [Å]</b>                                         | 15.3391(19)                                                                       | 11.862(2)                                                                        | 11.748(2)                                                                                         |
| <b>c [Å]</b>                                         | 23.869(3)                                                                         | 19.211(3)                                                                        | 20.722(4)                                                                                         |
| <b>α [deg]</b>                                       | 104.258(3)                                                                        | 97.837(5)                                                                        | 104.056(6)                                                                                        |
| <b>β [deg]</b>                                       | 92.735(3)                                                                         | 93.258(5)                                                                        | 92.793(6)                                                                                         |
| <b>γ [deg]</b>                                       | 116.887(3)                                                                        | 106.980(5)                                                                       | 111.557(5)                                                                                        |
| <b>V [Å<sup>3</sup>]</b>                             | 4716.5(10)                                                                        | 2128.1(6)                                                                        | 2226.8(7)                                                                                         |
| <b>Z</b>                                             | 4                                                                                 | 2                                                                                | 1                                                                                                 |
| <b>Density (calcd) [g cm<sup>-3</sup>]</b>           | 1.478                                                                             | 1.256                                                                            | 1.347                                                                                             |
| <b>μ [mm<sup>-1</sup>]</b>                           | 0.549                                                                             | 0.343                                                                            | 0.326                                                                                             |
| <b>F (000)</b>                                       | 2138                                                                              | 842                                                                              | 944                                                                                               |
| <b>Crystal size (mm<sup>3</sup>)</b>                 | 0.040 × 0.042 × 0.128                                                             | 0.064 × 0.129 × 0.206                                                            | 0.095 × 0.131 × 0.345                                                                             |
| <b>θ range for data collection [deg]</b>             | 1.99 to 25.35                                                                     | 2.26 to 25.35                                                                    | 1.93 to 25.35                                                                                     |
| <b>Reflections collected</b>                         | 120771                                                                            | 73359                                                                            | 65958                                                                                             |
| <b>Independent reflections</b>                       | 17268                                                                             | 7782                                                                             | 8134                                                                                              |
| <b>Data/restraints/parameters</b>                    | 17268 / 619 / 1388                                                                | 7782 / 139 / 561                                                                 | 8134 / 651 / 781                                                                                  |
| <b>GOF on F<sup>2</sup></b>                          | 1.015                                                                             | 1.024                                                                            | 1.097                                                                                             |
| <b>Final R1</b>                                      | R1 = 0.0467                                                                       | R1 = 0.0398                                                                      | R1 = 0.0851                                                                                       |
| <b>wR2 [I &gt; 2σ(I)]</b>                            | wR2 = 0.0982                                                                      | wR2 = 0.0903                                                                     | wR2 = 0.2143                                                                                      |
| <b>Largest diff. peak and hole [eÅ<sup>-3</sup>]</b> | 2.423 and -0.631                                                                  | 0.819 and -0.389                                                                 | 3.078 and -1.480                                                                                  |

For the refinement of compound **4** the squeeze function was applied due to large voids within the crystal structure. These voids most likely stem from evaporation of co-crystallized solvent. The crystal structure of compound **6** exhibits slight twinning due to the constitution of the measured crystal. **6** (and **3**) crystallize in adhered plates, therefore, no pristine single-crystal could be used in the measurement.

#### 5. References

- <sup>1</sup>Allen, F. H. (2004). ENCIFER. J. Applied Cryst. 37, 335-338.
- <sup>2</sup>Bruker (2015). APEX suite of crystallographic software. APEX 3 Version 2015.5-2. Bruker AXS Inc., Madison, Wisconsin, USA.
- <sup>3</sup>Bruker (2016). SAINT, Version 8.38A and SADABS Version 2016/2. Bruker AXS Inc., Madison, Wisconsin, USA.
- <sup>4</sup>Flack, H.D. (1983). Acta Cryst. A39, 876-881.
- <sup>5</sup>Huebschle, C. B.; Sheldrick, G. M.; Dittrich, B. (2011). SHELXL. J. Appl. Cryst., 44, (2011) 1281 - 1284.
- <sup>6</sup>Sheldrick, G. M. (2015). Acta Cryst. A71, 3-8.
- <sup>7</sup>Sheldrick, G. M. (2014). SHELXL2014. University of Göttingen, Germany.
- <sup>8</sup>Spek, A. L. (2011). PLATON, A Multipurpose Crystallographic Tool, Utrecht University, Utrecht, The Netherlands.
- <sup>9</sup>Spek, A.L. (2003). J. Appl. Cryst. 36, 7-13.
- <sup>10</sup>Wilson, A.J.C. (1992). Ed. International Tables for Crystallography, Volume C, Kluwer Academic Publishers, Dordrecht, The Netherlands.
